## Correction: Antibody targeting TSPAN12/ $\beta$ -catenin signaling in vasoproliferative retinopathy

**Felicitas Bucher, Martin Friedlander and Kyungmoo Yea**

Department of New Biology, Daegu-Gyeongbuk Institute of Science and Technology (DGIST), Daegu, Republic of Korea

**Published:** September 04, 2018

**Copyright:** Bucher et al. This is an open-access article distributed under the terms of the Creative Commons Attribution License 3.0 (CC BY 3.0), which permits unrestricted use, distribution, and reproduction in any medium, provided the original author and source are credited.

**This article has been corrected:** The correct affiliation for Kyungmoo Yea is given below:

Department of New Biology, Daegu-Gyeongbuk Institute of Science and Technology (DGIST), Daegu, Republic of Korea

Original article: Oncotarget. 2018; 9:12538-12539. <https://doi.org/10.18632/oncotarget.23401>
